# Supplementary material
Source: PubMed Central journal article supplement (PMC10843567)
Supplement: NIHMS1919811-supplement-1.pdf [file NIHMS1919811-supplement-1.pdf]

## Supplementary materials

### Methods

| <b>Supplementary Table 1. Outcomes from the emulated trials</b>                                                                                                                                                                                                                                                                                                                                                                                                                                                                                                                                                                                                                                                                                                                                                                                                                                                                                                 |
|-----------------------------------------------------------------------------------------------------------------------------------------------------------------------------------------------------------------------------------------------------------------------------------------------------------------------------------------------------------------------------------------------------------------------------------------------------------------------------------------------------------------------------------------------------------------------------------------------------------------------------------------------------------------------------------------------------------------------------------------------------------------------------------------------------------------------------------------------------------------------------------------------------------------------------------------------------------------|
| <b>PRONOUNCE trial</b>                                                                                                                                                                                                                                                                                                                                                                                                                                                                                                                                                                                                                                                                                                                                                                                                                                                                                                                                          |
| <b>Primary:</b> time to first occurrence of a major adverse cardiovascular event, a composite endpoint defined as all-cause death, nonfatal myocardial infarction, or nonfatal stroke                                                                                                                                                                                                                                                                                                                                                                                                                                                                                                                                                                                                                                                                                                                                                                           |
| <b>Secondary:</b> all-cause death, nonfatal myocardial infarction, or nonfatal stroke                                                                                                                                                                                                                                                                                                                                                                                                                                                                                                                                                                                                                                                                                                                                                                                                                                                                           |
| <b>GRADE trial</b>                                                                                                                                                                                                                                                                                                                                                                                                                                                                                                                                                                                                                                                                                                                                                                                                                                                                                                                                              |
| <b>Primary:</b> time to primary metabolic failure, calculated as days to hemoglobin A1c (HbA1c) $\geq 7\%$ while receiving the assigned medication, with eligibility for outcome ascertainment starting at month 3 after the index date (analogous to the first quarterly HbA1c assessment in GRADE).                                                                                                                                                                                                                                                                                                                                                                                                                                                                                                                                                                                                                                                           |
| <b>Secondary</b> The secondary outcomes were time to secondary metabolic failure (calculated as days to HbA1c $>7.5\%$ while receiving the assigned medication); time to tertiary metabolic failure/insulin initiation; proportions of patients experiencing primary, secondary, and tertiary metabolic failure at 1 and 2 years; number of emergency department visits or hospitalizations for hypoglycemia; incidence of end-stage kidney disease, retinopathy, treatment of retinopathy, peripheral neuropathy, MACE and its components, unstable angina requiring hospitalization or revascularization, heart failure hospitalization, pancreatitis, pancreatic or thyroid cancer, any cancer (except non-melanoma skin cancer), all-cause mortality, and all-cause hospitalization. The HbA1c outcomes were modified from the GRADE trial, where confirmation of an elevated result with a repeat HbA1c was required, as this is not done in routine care. |

As previously described,<sup>1,2</sup> inclusion and exclusion for the trials were identified from ClinicalTrials.gov and published trial protocols and were applied to beneficiaries included in OLDW. The date of an individual's first fill of the drugs of interest was defined as the index date (i.e., new-user design). Patients were required to have at least 6 months of continuous enrollment with medical and pharmacy coverage before the index date. Sociodemographic variables, comorbidities, and medication use during the baseline 6-month period were recorded. Variables were defined by the presence of a claim with eligible diagnosis codes, procedure codes, and prescriptions.

### Results

| <b>Supplementary Table 2. Comparison of the PRONOUNCE trial and emulated trial cohorts</b> |                               |                                                                                            |                       |            |                           |
|--------------------------------------------------------------------------------------------|-------------------------------|--------------------------------------------------------------------------------------------|-----------------------|------------|---------------------------|
|                                                                                            | <b>PRONOUNCE trial cohort</b> | <b>Emulated trial cohort</b>                                                               |                       |            |                           |
| <b>Characteristics</b>                                                                     | <b>Total (N=544)</b>          | <b>Definition of characteristics (if different) or clarification</b>                       | <b>Total (N=2226)</b> | <b>SMD</b> | <b>All SMDs &lt; 0.20</b> |
| <b>1. Age</b>                                                                              |                               | <b>Ascertainable</b>                                                                       |                       |            |                           |
| mean $\pm$ SD, years                                                                       | 73.2 $\pm$ 7.2                |                                                                                            | 75.0 $\pm$ 7.5        | 0.24       | No                        |
| <b>2. Race, n (%)</b>                                                                      | 541/544 (99.5)                | <b>Partially ascertainable:</b><br>OLDW combined race and ethnicity into a single variable | 2023/2226 (90.9)      |            |                           |
| American Indian or Alaska Native                                                           | 2 (0.4)                       |                                                                                            | -                     | -          | -                         |
| Asian                                                                                      | 8 (1.5)                       |                                                                                            | 51 (2.5)              | 0.06       | No                        |

| Supplementary Table 2. Comparison of the PROUNOUNCE trial and emulated trial cohorts |                        |                                                                                                                                                                                                                                                                                   |                          |      |                 |
|--------------------------------------------------------------------------------------|------------------------|-----------------------------------------------------------------------------------------------------------------------------------------------------------------------------------------------------------------------------------------------------------------------------------|--------------------------|------|-----------------|
|                                                                                      | PRONOUNCE trial cohort | Emulated trial cohort                                                                                                                                                                                                                                                             |                          |      |                 |
| Characteristics                                                                      | Total (N=544)          | Definition of characteristics (if different) or clarification                                                                                                                                                                                                                     | Total (N=2226)           | SMD  | All SMDs < 0.20 |
| Black or African American                                                            | 28 (5.2)               |                                                                                                                                                                                                                                                                                   | 415 (20.5)               | 0.42 |                 |
| White                                                                                | 503 (93.0)             |                                                                                                                                                                                                                                                                                   | 1557 (77.0)              | 0.62 |                 |
| <b>3. Ethnicity, n (%)<sup>a</sup></b>                                               | 540/544 (99.3)         | <b>Partially ascertainable:</b><br>OLDW combined race and ethnicity into a single variable. The number of Not Hispanic or Latino participants are inferred based on the total number of participants, the number of Hispanic or Latino participants, and the Unknown participants | 2129/2226 (95.6)         |      |                 |
| Hispanic or Latino                                                                   | 30 (5.6)               |                                                                                                                                                                                                                                                                                   | 106 (4.8)                | 0.04 | Yes             |
| Not Hispanic or Latino                                                               | 510 (94.4)             |                                                                                                                                                                                                                                                                                   | 2023 (90.9)              | 0.13 |                 |
| Unknown                                                                              |                        |                                                                                                                                                                                                                                                                                   | 97 (4.4)                 |      |                 |
| <b>4. Weight</b>                                                                     |                        |                                                                                                                                                                                                                                                                                   | <b>Not ascertainable</b> |      |                 |
| mean ± SD, kg                                                                        | 86.55                  |                                                                                                                                                                                                                                                                                   | -                        | -    | -               |
| <b>5. Body mass index, n (%)</b>                                                     | 541/544                | <b>Not ascertainable</b>                                                                                                                                                                                                                                                          | -                        | -    | -               |
| Mean ± SD, kg/m <sup>2</sup>                                                         | 28.48                  |                                                                                                                                                                                                                                                                                   | -                        | -    | -               |
| <b>6. Smoking status, n (%)</b>                                                      |                        | <b>Partially ascertainable:</b><br>Although OLDW has diagnosis codes for current smoking, which is likely incomplete, other smoking data are likely even more incomplete)                                                                                                         |                          |      |                 |
| Current                                                                              | 82 (15.1)              |                                                                                                                                                                                                                                                                                   | 403 (18.1%)              | 0.08 | Yes             |
| Former                                                                               | 211 (38.8)             |                                                                                                                                                                                                                                                                                   | -                        | -    | -               |
| Never                                                                                | 141 (25.9)             |                                                                                                                                                                                                                                                                                   | -                        | -    | -               |
| <b>7. Baseline blood pressure, n (%)</b>                                             |                        | <b>Not ascertainable</b>                                                                                                                                                                                                                                                          |                          |      |                 |
| diastolic >90 or systolic >140, mm Hg                                                | 184 (33.8)             |                                                                                                                                                                                                                                                                                   | -                        | -    | -               |
| <b>8. Total serum cholesterol</b>                                                    |                        | <b>Partially ascertainable:</b> Only 571 (25.7%) patients captured in OLDW                                                                                                                                                                                                        | 571/2226 (25.7)          |      |                 |
| mean ± SD, mmol/L                                                                    | 4.1 ± 1.09             |                                                                                                                                                                                                                                                                                   | 8.9 ± 2.14               | 2.83 | No              |
| <b>9. Type 2 diabetes</b>                                                            |                        |                                                                                                                                                                                                                                                                                   |                          |      |                 |
| n (%)                                                                                | 175 (32.2)             | <b>Ascertainable</b>                                                                                                                                                                                                                                                              | 875 (39.3)               | 0.15 | Yes             |

| Supplementary Table 2. Comparison of the PRONOUNCE trial and emulated trial cohorts |                        |                                                                                      |                     |      |                 |
|-------------------------------------------------------------------------------------|------------------------|--------------------------------------------------------------------------------------|---------------------|------|-----------------|
|                                                                                     | PRONOUNCE trial cohort | Emulated trial cohort                                                                |                     |      |                 |
| Characteristics                                                                     | Total (N=544)          | Definition of characteristics (if different) or clarification                        | Total (N=2226)      | SMD  | All SMDs < 0.20 |
| <b>10. N-Terminal prohormone B-type natriuretic peptide, n (%)</b>                  | 529/544                | <b>Not ascertainable:</b><br>Only 3 patients captured in OLDW                        | -                   | -    | -               |
| Mean ± SD, pg/mL                                                                    | 670.2 ± 2479           |                                                                                      | -                   | -    | -               |
| <b>11. High-sensitivity C-reactive protein, n (%)</b>                               | 534/544                | <b>Partially ascertainable:</b> Only 42 (1.9) patients captured in OLDW              | 42/2226 (1.9)       |      |                 |
| Mean ± SD, mg/dL                                                                    | 0.6308 ± 1.8           |                                                                                      | 0.6 ± 1.0           | 0.02 | Yes             |
| <b>12. Troponin T, n (%)</b>                                                        | 524/544                | <b>Not ascertainable</b>                                                             | -                   | -    | -               |
| Mean ± SD, pg/mL                                                                    | 18.21 ± 17.71          |                                                                                      | -                   | -    | -               |
| Prostate cancer therapy history, n (%)                                              |                        |                                                                                      |                     |      |                 |
| <b>13. Radiotherapy, n (%)</b>                                                      | 73 (13.4)              | <b>Ascertainable:</b> Prior radiotherapy (within 6 months before index date)         | 36 (1.6)            | 0.46 | No              |
| <b>14. Radical prostatectomy, n (%)</b>                                             | 64 (11.8)              | <b>Ascertainable</b>                                                                 | 51 (2.3)            | 0.38 | No              |
| <b>15. Hormonal therapy, n (%)</b>                                                  | 44 (8.1)               | <b>NA:</b> This was an exclusion criteria                                            | NA                  | NA   | NA              |
| <b>16. Other, n (%)</b>                                                             | 24 (4.4)               | <b>NA:</b> No information provided in PRONOUNCE Trial                                | -                   | -    | -               |
| <b>17. Gleason score, n (%)</b>                                                     |                        | <b>Not ascertainable</b>                                                             |                     |      |                 |
| 2–4                                                                                 | 3 (0.6)                |                                                                                      | -                   | -    | -               |
| 5–6                                                                                 | 67 (12.3)              |                                                                                      | -                   | -    | -               |
| 7–10                                                                                | 472 (86.8)             |                                                                                      | -                   | -    | -               |
| <b>18. Stage of prostate cancer, n (%)</b>                                          |                        | <b>Not ascertainable:</b><br>Only baseline metastatic cancer can be captured in OLDW |                     |      |                 |
| Localized                                                                           | 271 (49.8)             |                                                                                      | -                   | -    | -               |
| Locally advanced                                                                    | 143 (26.3)             |                                                                                      | -                   | -    | -               |
| Metastatic                                                                          | 111 (20.4)             |                                                                                      | 497 (22.3%)         | 0.05 | Yes             |
| Not classifiable                                                                    | 19 (3.5)               |                                                                                      | -                   | -    | -               |
| <b>19. Testosterone, n (%)</b>                                                      | 543/544 (99.8)         | <b>Partially ascertainable:</b> Only 122 (5.5%) patients captured in OLDW            | 122/2226 (5.5)      |      |                 |
| Median (25th, 75th), ng/dL                                                          | 330.0 (250, 416)       |                                                                                      | 293.5(182.0, 436.0) | NA   | NA              |
| Mean ± SD, ng/dL                                                                    | 332 ± 123.39           |                                                                                      | 326.3 (219.4)       | 0.03 | Yes             |

| Supplementary Table 2. Comparison of the PRONOUNCE trial and emulated trial cohorts |                        |                                                                                                                                                                                                                                                                                                                                                                                                                                                                                                                           |                  |             |                 |
|-------------------------------------------------------------------------------------|------------------------|---------------------------------------------------------------------------------------------------------------------------------------------------------------------------------------------------------------------------------------------------------------------------------------------------------------------------------------------------------------------------------------------------------------------------------------------------------------------------------------------------------------------------|------------------|-------------|-----------------|
|                                                                                     | PRONOUNCE trial cohort | Emulated trial cohort                                                                                                                                                                                                                                                                                                                                                                                                                                                                                                     |                  |             |                 |
| Characteristics                                                                     | Total (N=544)          | Definition of characteristics (if different) or clarification                                                                                                                                                                                                                                                                                                                                                                                                                                                             | Total (N=2226)   | SMD         | All SMDs < 0.20 |
| <b>20. Prostate specific antigen, n (%)</b>                                         | 543/544 (99.8)         | <b>Partially ascertainable:</b> Only 846 (38%) patients captured in OLDW                                                                                                                                                                                                                                                                                                                                                                                                                                                  | 846/2226 (38.0)  |             |                 |
| Mean ± SD, ng/mL                                                                    | 17.1 (20.0)            |                                                                                                                                                                                                                                                                                                                                                                                                                                                                                                                           | 64.9 (304.7)     | 0.22        | No              |
| Median (25th, 75th), ng/mL                                                          | 12.8 (5.8, 32.7)       |                                                                                                                                                                                                                                                                                                                                                                                                                                                                                                                           | 11.0 (5.8, 27.3) | NA          | NA              |
| Cardiac disorders, n (%)                                                            | 472/544 (86.8)         |                                                                                                                                                                                                                                                                                                                                                                                                                                                                                                                           |                  |             |                 |
| <b>21. Myocardial infarction</b>                                                    | 252 (46.3)             | <b>Ascertainable</b>                                                                                                                                                                                                                                                                                                                                                                                                                                                                                                      | 812 (36.5)       | 0.20        | No              |
| <b>22. Coronary carotid, or iliofemoral revascularization</b>                       | 393 (72.2)             | <b>Ascertainable</b>                                                                                                                                                                                                                                                                                                                                                                                                                                                                                                      | 2038 (91.6)      | 0.52        | No              |
| <b>23. Coronary, carotid, or iliofemoral stenosis &gt;50% by angiography, n (%)</b> | 228 (41.9%)            | <b>Not ascertainable</b>                                                                                                                                                                                                                                                                                                                                                                                                                                                                                                  | -                | -           | -               |
| <b>24. Carotid stenosis &gt;50% by ultrasound, n (%)</b>                            | 35 (6.4)               | <b>Not ascertainable</b>                                                                                                                                                                                                                                                                                                                                                                                                                                                                                                  | -                | -           | -               |
| <b>25. Ankle-brachial index &lt;0.9, n (%)</b>                                      | 75 (13.8)              | <b>Not ascertainable</b>                                                                                                                                                                                                                                                                                                                                                                                                                                                                                                  | -                | -           | -               |
| <b>26. Atrial fibrillation, n (%)</b>                                               | 102 (18.8)             | <b>Ascertainable</b>                                                                                                                                                                                                                                                                                                                                                                                                                                                                                                      | 386 (17.3)       | <b>0.04</b> | <b>Yes</b>      |
| <b>27. Dyslipidemia, n (%)</b>                                                      | 197 (36.2)             | <b>Ascertainable</b>                                                                                                                                                                                                                                                                                                                                                                                                                                                                                                      | 1671 (75.1)      | 0.85        | No              |
| <b>28. Hypertension, n (%)</b>                                                      | 467 (85.8)             | <b>Ascertainable</b>                                                                                                                                                                                                                                                                                                                                                                                                                                                                                                      | 1743 (78.3)      | <b>0.20</b> | <b>Yes</b>      |
| <b>Concomitant medications, n (%)</b>                                               |                        |                                                                                                                                                                                                                                                                                                                                                                                                                                                                                                                           |                  |             |                 |
| <b>29. Cardiovascular medications</b>                                               | 530 (97.4)             | <b>Partially ascertainable:</b> PRONOUNCE Trial protocol did not list specific drugs, so we used: Benazepril, Captopril, Enalapril, Fosinopril, Lisinopril, Moexipril, Perindopril, Quinapril, Ramipril, Trandolapril, Azilsartan, Candesartan, Eprosartan, Irbesartan, Losartan, Olmesartan, Telmisartan, Valsartan, Sacubitril-valsartan, Aliskiren, Bendroflumethiazide, Chlorothiazide, Chlorthalidone, Hydochlorothiazide, Indapamide, Methyclothiazide, Metolazone, Bumetanide, Etherynate Sodium, Ethacrynic acid, | 1804 (81.0)      | 0.55        | No              |

| Supplementary Table 2. Comparison of the PRONOUNCE trial and emulated trial cohorts |                        |                                                                                                                                                                                                                                                                                                                                                                                                                                                                                                                                                                                                                                                  |                |             |                 |
|-------------------------------------------------------------------------------------|------------------------|--------------------------------------------------------------------------------------------------------------------------------------------------------------------------------------------------------------------------------------------------------------------------------------------------------------------------------------------------------------------------------------------------------------------------------------------------------------------------------------------------------------------------------------------------------------------------------------------------------------------------------------------------|----------------|-------------|-----------------|
|                                                                                     | PRONOUNCE trial cohort | Emulated trial cohort                                                                                                                                                                                                                                                                                                                                                                                                                                                                                                                                                                                                                            |                |             |                 |
| Characteristics                                                                     | Total (N=544)          | Definition of characteristics (if different) or clarification                                                                                                                                                                                                                                                                                                                                                                                                                                                                                                                                                                                    | Total (N=2226) | SMD         | All SMDs < 0.20 |
|                                                                                     |                        | Furosemide, Torsemide, Amiloride, Triamterene, Eplerenone, Spironolactone, Atenolol, Betaxolol, Bisoprolol, Metoprolol Tartrate, Metoprolol Succinate, Nebivolol, Nadolol, Propranolol, Acebutolol, Pindolol, Timolol, Carvedilol, Labetalol, Esmolol, Sotalol, Amlodipine, Felodipine, Isradipine, Nicardipine, Nifedipine, Nisoldipine, Clevidipine, Torsemide, Nimodipine, Diltiazem, Verapamil, Doxazosin, Prazosin, Terazosin, Alfuzosin, Clonidine, Methyldopa, Guanfacine, Hydralazine, Minoxidil, Guanethidine, Tolazoline, Sodium Nitroprusside, Phenoxybenzamine Hydrochloride, Phentolamine, Fenoldopam, Acetazolamide, Methazolamide |                |             |                 |
| <b>30. Lipid-modifying agents</b>                                                   | 458 (84.2)             | <b>Partially ascertainable:</b> PRONOUNCE Trial protocol did not list specific drugs, so we used statin and non-statin lipid lowering medications                                                                                                                                                                                                                                                                                                                                                                                                                                                                                                | 1779 (80.0)    | <b>0.11</b> | Yes             |
| <b>31. Agents acting on the renin-angiotensin system</b>                            | 396 (72.8)             | <b>Partially ascertainable:</b> PRONOUNCE Trial protocol did not list specific drugs, so we used angiotensin-converting-enzyme inhibitors/angiotensin II receptor blockers                                                                                                                                                                                                                                                                                                                                                                                                                                                                       | 1179 (53.0)    | 0.42        | No              |

| <b>Supplementary Table 2. Comparison of the PRONOUNCE trial and emulated trial cohorts</b> |                               |                                                                                                                                                                                                                                                                                          |                       |            |                           |
|--------------------------------------------------------------------------------------------|-------------------------------|------------------------------------------------------------------------------------------------------------------------------------------------------------------------------------------------------------------------------------------------------------------------------------------|-----------------------|------------|---------------------------|
|                                                                                            | <b>PRONOUNCE trial cohort</b> | <b>Emulated trial cohort</b>                                                                                                                                                                                                                                                             |                       |            |                           |
| <b>Characteristics</b>                                                                     | <b>Total (N=544)</b>          | <b>Definition of characteristics (if different) or clarification</b>                                                                                                                                                                                                                     | <b>Total (N=2226)</b> | <b>SMD</b> | <b>All SMDs &lt; 0.20</b> |
| <b>32. <math>\beta</math>-Blockers</b>                                                     | 374 (68.8)                    | <b>Partially ascertainable:</b><br>PRONOUNCE Trial protocol did not list specific drugs, so we used: Atenolol, Betaxolol, Bisoprolol, Metoprolol Tartrate, Metoprolol Succinate, Nebivolol, Nadolol, Propranolol, Acebutolol, Pindolol, Timolol, Carvedilol, Labetalol, Esmolol, Sotalol | 1154 (51.8)           | 0.35       | No                        |

<sup>a</sup> Ethnicity is assigned by an external vendor who uses a rule-based system that combines analysis of first names, middle names, surnames, and surname prefixes and suffixes with geographic criteria. Optum Labs then assigns these ethnicity values into one of five compliance-determined race/ethnicity code values: W (Non-Hispanic White), B (Non-Hispanic Black), H (Hispanic), A (Asian), and U (Unknown).  
mm Hg, millimeters of mercury; mmol/L, millimole per liter; ng/mL, nanograms per milliliter; OLDW, OptumLabs Data Warehouse; pg/mL, picograms per milliliter; SD, standard deviation;

| Supplementary Table 3. Comparison of GRADE trial and emulated trial cohorts |                    |                                                                                         |                |      |                |
|-----------------------------------------------------------------------------|--------------------|-----------------------------------------------------------------------------------------|----------------|------|----------------|
|                                                                             | GRADE Trial cohort | Trial emulation cohort                                                                  |                |      |                |
| Characteristics                                                             | Total (N = 5,047)* | Definition of characteristics (if different) or clarification                           | Total (N=7540) | SMD  | All SMDs <0.20 |
| <b>1. Age</b>                                                               |                    | <b>Ascertainable</b>                                                                    |                |      |                |
| mean ± SD, years                                                            | 57.2 ±10.0         |                                                                                         | 61.9 ±11.0     | 0.45 | No             |
| N (%) age group, years                                                      |                    |                                                                                         |                |      |                |
| <45                                                                         | 619 (12.3)         |                                                                                         | 539 (7.1)      | 0.18 |                |
| 45–59                                                                       | 2327 (46.1)        |                                                                                         | 2447 (32.5)    | 0.28 |                |
| ≥60                                                                         | 2101 (41.6)        |                                                                                         | 4554 (60.4)    | 0.38 |                |
| <b>2. Sex, n (%)</b>                                                        |                    | <b>Ascertainable</b>                                                                    |                |      |                |
| Male sex                                                                    | 3210 (63.6)        |                                                                                         | 3868 (51.3)    | 0.25 | No             |
| <b>3. Race, n (%)</b>                                                       |                    | <b>Partially ascertainable: OLDW combined race and ethnicity into a single variable</b> |                |      |                |
| White                                                                       | 3,314 (65.7)       |                                                                                         | 4870 (64.6)    | 0.02 | Yes            |
| African American or Black                                                   | 1,000 (19.8)       |                                                                                         | 969 (12.9)     | 0.19 |                |
| Asian                                                                       | 182 (3.6)          |                                                                                         | 479 (6.4)      | 0.13 |                |
| AI/AN                                                                       | 137 (2.7)          |                                                                                         | -              | -    | -              |
| Native Hawaiian or other Pacific Islander                                   | 28 (0.6)           |                                                                                         | -              | -    | -              |
| Other or more than one race                                                 | 319 (6.3)          |                                                                                         | -              | -    | -              |
| Unknown or not reported                                                     | 67 (1.3)           |                                                                                         | 284 (3.8)      | 0.16 |                |
| <b>4. Ethnicity, n (%)</b>                                                  |                    | <b>Partially ascertainable: OLDW combined race and ethnicity into a single variable</b> |                |      |                |
| Hispanic/Latino                                                             | 929 (18.4)         |                                                                                         | 938 (12.4)     | 0.17 | Yes            |
| Not Hispanic/Latino                                                         | 4077 (80.8)        |                                                                                         | -              | -    | -              |
| Unknown/not reported                                                        | 41 (0.8)           |                                                                                         | -              | -    | -              |
| <b>5. Education completed, n (%)</b>                                        |                    | <b>Partially ascertainable: education has high rates of missingness in OLDW</b>         |                |      |                |
| <High school                                                                | 364 (7.2)          |                                                                                         | 52 (0.7)       | 0.34 | No             |
| High school graduate                                                        | 1039 (20.6)        |                                                                                         | 2128 (28.2)    | 0.18 |                |
| Some college                                                                | 1463 (29.0)        |                                                                                         | 4042 (53.6)    | 0.52 |                |
| ≥College degree                                                             | 2180 (43.2)        |                                                                                         | 1220 (16.2)    | 0.62 |                |
| Unknown                                                                     |                    |                                                                                         | 98 (1.3)       |      |                |
| <b>6. Duration of diabetes</b>                                              |                    | <b>Not ascertainable</b>                                                                |                |      |                |
| Mean ± SD, years                                                            | 4.2 ± 2.8          |                                                                                         | -              | -    | -              |
| Median (IQR)                                                                | 3.8 (1.9, 6.4)     |                                                                                         | -              | -    | -              |
| <b>7. Screening metformin dose</b>                                          |                    | <b>Not ascertainable</b>                                                                |                |      |                |
| Mean ± SD, mg/day                                                           | 1575.5 ± 525.2     |                                                                                         | -              | -    | -              |
| <b>8. Baseline metformin dose</b>                                           |                    | <b>Not ascertainable: the number of tablets issued for metformin do not necessarily</b> |                |      |                |
| Mean ± SD, mg/day                                                           | 1944.2 ± 204.5     |                                                                                         | -              |      |                |

|                                                                       |                  |                                                                                                                                                     |             |      |     |
|-----------------------------------------------------------------------|------------------|-----------------------------------------------------------------------------------------------------------------------------------------------------|-------------|------|-----|
|                                                                       |                  | correspond to the dose because patients receive a full prescription up front.                                                                       |             |      |     |
| <b>9. Family history of any first-degree relatives with diabetes,</b> |                  |                                                                                                                                                     |             |      |     |
| N (%)                                                                 | 3522 (69.8)      | <b>Not ascertainable</b>                                                                                                                            | -           | -    | -   |
| Medical history, n (%)                                                |                  |                                                                                                                                                     |             |      |     |
| <b>10. Heart attack/stroke, n (%)</b>                                 | 330 (6.5)        | <b>Ascertainable</b>                                                                                                                                | 631 (8.4)   | 0.07 | Yes |
| <b>11. Retinopathy, n (%)</b>                                         | 49 (1.0)         | <b>Ascertainable</b>                                                                                                                                | 362 (4.8)   | 0.23 | No  |
| <b>12. Neuropathy, n (%)</b>                                          | 1,083 (21.5)     | <b>Ascertainable</b>                                                                                                                                | 907 (12.0)  | 0.26 | No  |
| <b>13. Hypertension, n (%)</b>                                        | 3,360 (66.6)     | <b>Ascertainable</b>                                                                                                                                | 5637 (74.8) | 0.18 | Yes |
| <b>14. Elevated blood lipids, n (%)</b>                               | 3,646 (72.2)     | <b>Ascertainable</b>                                                                                                                                | 5620 (74.5) | 0.05 | Yes |
| Current medications, n (%)                                            |                  |                                                                                                                                                     |             |      |     |
| <b>15. Blood pressure medications</b>                                 | 3495 (69.2)      | <b>Partially ascertainable:</b><br>GRADE Trial did not list specific drugs, so we used cardiac medications                                          | 6023 (79.9) | 0.25 | No  |
| <b>16. Lipid-lowering medications</b>                                 | 3317 (65.7)      | <b>Partially ascertainable:</b><br>GRADE Trial did not list specific drugs, so we used statin and non-statin lipid lowering medications             | 6180 (82.0) | 0.38 | No  |
| <b>17. Statin</b>                                                     | 3209 (63.6)      | <b>Ascertainable</b>                                                                                                                                | 5163 (68.5) | 0.10 | Yes |
| <b>18. Aspirin</b>                                                    | 2288 (45.3)      | <b>Not ascertainable:</b><br>Data for only 34 patients captured in OLDW and aspirin can be over the counter                                         | -           | -    | -   |
| <b>19. Depression/anxiety medication(s), n (%)†</b>                   | 472/2502 (18.9)† | <b>Not ascertainable</b>                                                                                                                            | -           | -    | -   |
| <b>20. Smoking status, n (%)</b>                                      |                  |                                                                                                                                                     |             |      |     |
| Current                                                               | 695 (13.8)       | <b>Partially ascertainable:</b><br>Although OLDW has diagnosis codes for current smoking, which is likely incomplete, other smoking data are likely | 382 (5.1)   | 0.30 | No  |
| Former                                                                | 1617 (32.0)      |                                                                                                                                                     | -           | -    | -   |
| Never                                                                 | 2735 (54.2)      |                                                                                                                                                     | -           | -    | -   |



|                                             |                 |                                                                                              |                  |      |     |
|---------------------------------------------|-----------------|----------------------------------------------------------------------------------------------|------------------|------|-----|
|                                             |                 | even more incomplete                                                                         |                  |      |     |
| <b>21. Weight, mean ± SD, kg</b>            | 100.0 ± 22.3    | <b>Not ascertainable</b>                                                                     | -                | -    | -   |
| <b>22. BMI, mean ± SD, kg/m<sup>2</sup></b> | 34.3 ± 6.8      | <b>Not ascertainable</b>                                                                     | -                | -    | -   |
| <b>23. Blood pressure</b>                   |                 | <b>Not ascertainable</b>                                                                     | -                | -    | -   |
| Systolic, mean ± SD, mmHg                   | 128.3 ± 14.7    |                                                                                              | -                | -    | -   |
| Diastolic, mean ± SD, mmHg                  | 77.3 ± 9.9      |                                                                                              | -                | -    | -   |
| N (%) <140/90 mmHg                          | 3,802 (75.3)    |                                                                                              | -                | -    | -   |
| N (%) <130/80 mmHg                          | 2,172 (43.0)    |                                                                                              | -                | -    | -   |
| Laboratory tests*                           |                 |                                                                                              |                  |      |     |
| <b>24. HbA1c</b>                            |                 | <b>Partially ascertainable</b>                                                               |                  |      |     |
| Mean ± SD, %                                | 7.5 ± 0.5       |                                                                                              | 7.6 ± 0.5        | 0.20 | Yes |
| Mean ± SD, mmol/L                           | 58 ± 5.3        |                                                                                              | NA               | NA   | NA  |
| N (%) <7%                                   | 725 (14.4)      |                                                                                              | NA               | NA   | NA  |
| <b>25. Cholesterol, n (%)</b>               |                 | <b>Partially ascertainable:</b><br>Data for 4860 (64.5%) patients were captured in OLDW      |                  |      |     |
| Mean ± SD, mg/dL                            | 163.8 ± 37.8    |                                                                                              | 172.0 ± 39.4     | 0.21 | No  |
| Mean ± SD, mmol/L                           | 4.2 ± 0.98      |                                                                                              | NA               | NA   | NA  |
| <b>26. Triglycerides</b>                    |                 | <b>Partially ascertainable:</b><br>Data for 4860 (64.5%) patients were captured in OLDW      |                  |      |     |
| Mean ± SD, mg/dL                            | 154.0 ± 121.6   |                                                                                              | 185.4 ± 115.2    | 0.27 | No  |
| Mean ± SD, mmol/L                           | 1.7 ± 1.4       |                                                                                              | NA               | NA   | NA  |
| <b>27. HDL, n (%)</b>                       |                 | <b>Partially ascertainable:</b><br>Data for 4812 (63.8%) patients were captured in OLDW      |                  |      |     |
| Mean ± SD, mg/dL                            | 43.4 ± 10.6     |                                                                                              | 45.6 ± 12.5      | 0.19 | Yes |
| Mean ± SD, mmol/L                           | 1.1 ± 0.3       |                                                                                              | NA               | NA   | NA  |
| <b>28. LDL, n (%)</b>                       |                 | <b>Partially ascertainable:</b><br>Data for 4741 (62.9%) patients were captured in OLDW      |                  |      |     |
| Mean ± SD, mg/dL                            | 90.5 ± 31.7     |                                                                                              | 90.9 ± 33.0      | 0.01 | Yes |
| Mean ± SD, mmol/L                           | 2.3 ± 0.8       |                                                                                              | NA               | NA   | NA  |
| N (%) <100 mg/dL                            | 3,348 (66.3)    |                                                                                              | NA               | NA   | NA  |
| <b>29. UACR, n (%)</b>                      |                 | <b>Partially ascertainable:</b><br>Data for only 1554 (20.6%) patients were captured in OLDW |                  |      |     |
| Medium (Q1, Q2), mg/g                       | 6.4 (3.1, 16.9) |                                                                                              | 11.0 (5.5, 29.4) |      |     |
| N (%) <30 mg/g creatinine                   | 4241 (84.1)     |                                                                                              | 1169 (75.2)      | 0.22 | No  |
| <b>30. Fasting glucose, n (%)</b>           |                 | <b>Not ascertainable:</b><br>Data for only 136 (1.8%) patients                               |                  |      |     |
| Mean ± SD, mg/dL                            | 151.5 ± 30.9    |                                                                                              | -                | -    | -   |
| Mean ± SD, mmol/L                           | 8.4 ± 1.7       |                                                                                              | NA               | NA   | NA  |

|                                                                                                                                                                                                                                                                                                                                                                                                                                                                                              |              |                                                                                                                     |                  |      |    |
|----------------------------------------------------------------------------------------------------------------------------------------------------------------------------------------------------------------------------------------------------------------------------------------------------------------------------------------------------------------------------------------------------------------------------------------------------------------------------------------------|--------------|---------------------------------------------------------------------------------------------------------------------|------------------|------|----|
|                                                                                                                                                                                                                                                                                                                                                                                                                                                                                              |              | captured in<br>OLDW (research<br>lab)                                                                               |                  |      |    |
| <b>31. eGFR, n (%)</b>                                                                                                                                                                                                                                                                                                                                                                                                                                                                       |              | <b>Partially<br/>ascertainable:</b><br>Data for 5340<br>(70.8%) patients<br>were captured in<br>OLDW                |                  |      |    |
| Mean ± SD, mL/min/1.73<br>m <sup>2</sup>                                                                                                                                                                                                                                                                                                                                                                                                                                                     | 95.3 ± 16.9  |                                                                                                                     | 84.9 ± 17.9      | 0.60 | No |
| N (%) <60 mL/min/1.73 m <sup>2</sup>                                                                                                                                                                                                                                                                                                                                                                                                                                                         | 121 (2.4)    |                                                                                                                     | 510 (9.5)        | 0.30 |    |
| <b>32. Serum creatinine, n (%)</b>                                                                                                                                                                                                                                                                                                                                                                                                                                                           |              | <b>Partially<br/>ascertainable:</b><br>Data for 5340<br>(70.8%) patients<br>were captured in<br>OLDW                | 5340/7540 (70.8) |      |    |
| Mean ± SD, mg/dL                                                                                                                                                                                                                                                                                                                                                                                                                                                                             | 0.83 ± 0.2   |                                                                                                                     | 0.88 (0.20)      | 0.25 | No |
| <b>33. Fasting C-peptide, n (%)</b>                                                                                                                                                                                                                                                                                                                                                                                                                                                          |              | <b>Not<br/>ascertainable:</b><br>Data for only 60<br>(0.8%) patients<br>were captured in<br>OLDW (research<br>labs) |                  |      |    |
| Mean ± SD, nmol/L                                                                                                                                                                                                                                                                                                                                                                                                                                                                            | 1.34 ± 0.6   |                                                                                                                     | -                | -    | -  |
| <b>34. Fasting insulin, pmol/L</b>                                                                                                                                                                                                                                                                                                                                                                                                                                                           | 129.4 ± 95.4 | <b>Not<br/>ascertainable:</b><br>Data for only 5<br>(0.1%) patients<br>were captured in<br>OLDW (research<br>labs)  | -                | -    | -  |
| Fasting insulin, mU/L)                                                                                                                                                                                                                                                                                                                                                                                                                                                                       | 21.6 ± 15.9  |                                                                                                                     | -                | -    | -  |
| *N was 5,047 except for depression/anxiety medication question (see next note).<br>†This question was added after the study started and was answered by 2,498 participants at baseline. Of these, 472 participants answered “yes” and 2,032 participants answered “no”: 472/2,502 = 0.19.<br>mm Hg, millimeters of mercury; mmol/L, millimole per liter; ng/mL, nanograms per milliliter; OLDW, OptumLabs Data Warehouse; SD, standard deviation; UACR, urinary albumin to-creatinine ratio. |              |                                                                                                                     |                  |      |    |

## Discussion

In the original GRADE analysis plan, a discrete time logistic regression model was proposed to estimate event rates across time and be flexible to non-proportional hazards. However, in the primary publication for the GRADE trial,<sup>3</sup> the analysis was changed to a restricted mean survival time, which cannot be directly compared with the estimates from the trial emulation following the original analysis plan. Similarly, the PRONOUNCE trial specified prior hormonal therapy (unless terminated at least 12 months prior to trial) as an exclusion criterion on ClinicalTrials.gov, but ultimately did not use it as an exclusion criterion in the published results. Therefore, our emulation excluded these patients, which accounted for 8.1% of the published PRONOUNCE trial’s population. This underscores the importance of updating ClinicalTrials.gov and maintaining transparent study protocols and data sharing plans.

## References

1. Wallach JD, Deng Y, McCoy RG, et al. Real-world Cardiovascular Outcomes Associated With Degarelix vs Leuprolide for Prostate Cancer Treatment. *JAMA Netw Open* 2021; 4: e2130587. 20211001. DOI: 10.1001/jamanetworkopen.2021.30587.
2. Deng Y, Polley EC, Wallach JD, et al. Emulating the GRADE trial using real world data: retrospective comparative effectiveness study. *BMJ* 2022; 379: e070717. 20221003. DOI: 10.1136/bmj-2022-070717.
3. Nathan DM, Lachin JM, Balasubramanyam A, et al. Glycemia Reduction in Type 2 Diabetes - Glycemic Outcomes. *N Engl J Med* 2022; 387: 1063-1074. DOI: 10.1056/NEJMoa2200433.
